# Supplementary material for: Environmental formaldehyde sensing at room temperature by smartphone-assisted and wearable plasmonic nanohybrids
Source: Royal Society of Chemistry journal article supplement (doi:10.1039/d2nr06599a), 2023-01-01
Supplement: d2nr06599a1.pdf [file d2nr06599a1.pdf]

# Electronic Supplementary Information

## Environmental formaldehyde sensing at room temperature by smartphone-assisted and wearable plasmonic nanohybrids

Andreas T. Güntner<sup>1,2,†,\*</sup> and Florian M. Schenk<sup>3,†</sup>

<sup>1</sup> Human-centered Sensing Laboratory, Department of Mechanical and Process Engineering, ETH Zurich, CH-8092 Zurich, Switzerland.

<sup>2</sup> Department of Endocrinology, Diabetology, and Clinical Nutrition, University Hospital Zurich (USZ) and University of Zurich (UZH), CH-8091 Zürich, Switzerland.

<sup>3</sup> Particle Technology Laboratory, Department of Mechanical and Process Engineering, ETH Zurich, CH-8092 Zurich, Switzerland.

## Contents

|                                                                               |            |
|-------------------------------------------------------------------------------|------------|
| <b>Supplementary Discussion</b>                                               | <b>S-1</b> |
| Material characterization for TiO <sub>2</sub>                                | S-1        |
| <b>Supplementary References</b>                                               | <b>S-1</b> |
| <b>Supplementary Figures</b>                                                  | <b>S-2</b> |
| ESI Figure 1   HAADF-STEM images of Ag/AgO <sub>x</sub> clusters              | S-2        |
| ESI Figure 2   HAADF-STEM image and EDX spectra                               | S-2        |
| ESI Figure 3   Transient UV/Vis reflectance spectra and LSPR sensor responses | S-3        |
| ESI Figure 4   Reflectance spectra of Ag/AgO <sub>x</sub> on SiO <sub>2</sub> | S-3        |
| ESI Figure 5   XRD patterns                                                   | S-4        |
| ESI Figure 6   Film morphology                                                | S-4        |
| ESI Figure 7   Temperature and RH of inlet gas                                | S-5        |
| ESI Figure 8   Crystal and particle sizes of TiO <sub>2</sub>                 | S-5        |

## Supplementary Discussion

### Material characterization for TiO<sub>2</sub>

The TiO<sub>2</sub> nanoparticles (darker in **Fig. 1b**) at 4 wt% Ag/AgO<sub>x</sub> are faceted and quite aggregated, as indicated by visible sinter necks formed probably during the annealing at 500 °C for 5 h. The TiO<sub>2</sub> particles consist primarily (88 wt%) of the anatase phase, as identified by XRD (**Fig. 1d**, circles) and in line with literature<sup>70</sup>. The remainder is rutile phase (squares). Note that at 20 wt% Ag/AgO<sub>x</sub>, also titanium suboxides (i.e. Ti<sub>3</sub>O<sub>5</sub>, downward triangles, and Ti<sub>4</sub>O<sub>7</sub>, upward triangles) are observed, in agreement with literature<sup>19</sup>. At 4 wt% Ag/AgO<sub>x</sub>, the average particle size of 13 nm (as determined by N<sub>2</sub> adsorption) is quite similar to the anatase and rutile crystal sizes (both 12 nm) suggesting monocrystallinity, as observed consistently for all Ag loadings (**ESI Fig. 8**).

### Supplementary References

- 70 Teleki, A., Pratsinis, S. E., Kalyanasundaram, K. & Gouma, P. I. Sensing of organic vapors by flame-made TiO<sub>2</sub> nanoparticles. *Sens. Actuators B* 119, 683-690 (2006).

## Supplementary Figures

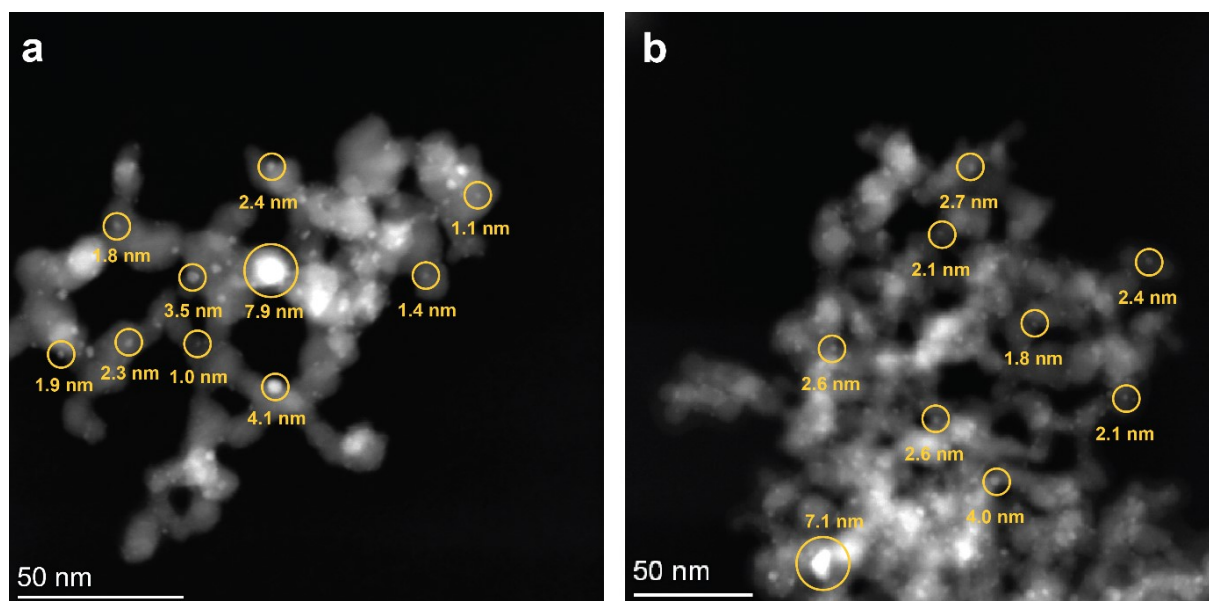

**ESI Fig. 1** HAADF-STEM images of Ag/AgO<sub>x</sub> clusters. (a,b) Two different HAADF-STEM (Z-contrast) images of 4 wt% Ag/AgO<sub>x</sub> on TiO<sub>2</sub> nanohybrids.

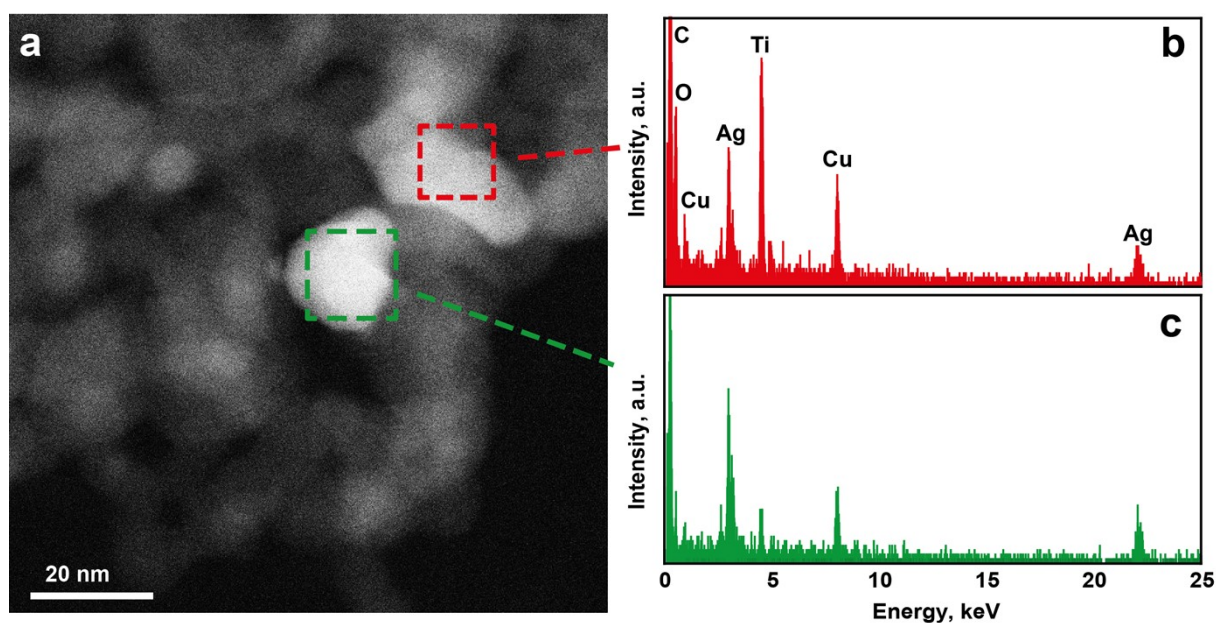

**ESI Fig. 2** HAADF-STEM image and EDX spectra. (a) HAADF-STEM image (Z-contrast) of flame-made and annealed (500 °C for 5 h) TiO<sub>2</sub> nanoparticles with nominal 4 wt% Ag. EDX spectra of the marked red (b) and green (c) areas with indicated energies for Ag, Ti and O. Note that the Cu and C are associated to the TEM grid.

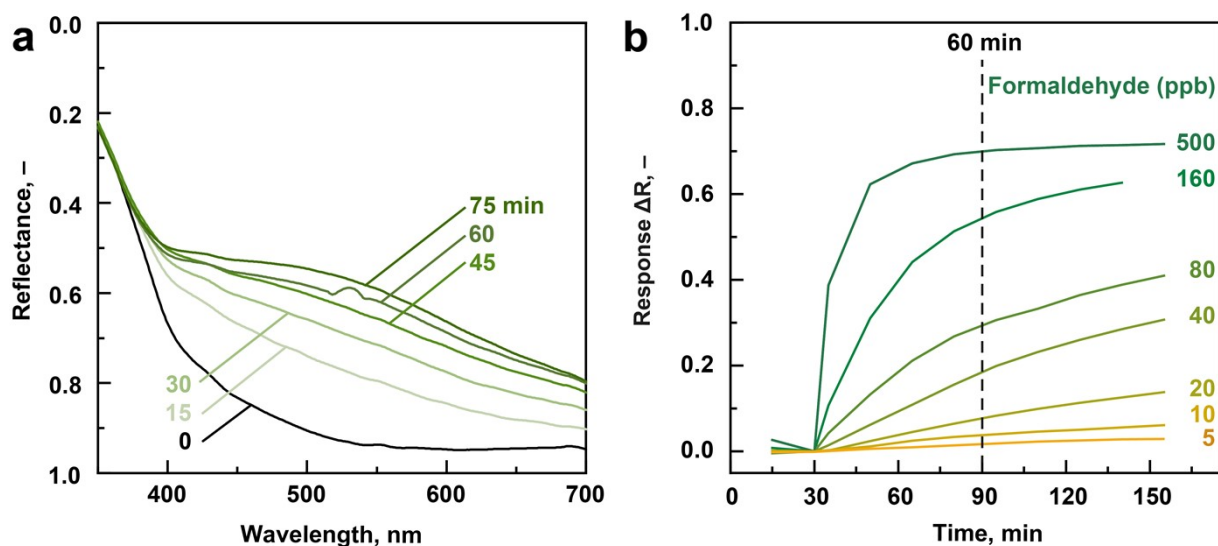

**ESI Fig. 3** Transient UV/Vis reflectance spectra and LSPR sensor responses. (a) UV/Vis reflectance spectra of 4 wt% Ag/AgO<sub>x</sub>-TiO<sub>2</sub> nanohybrids when exposed for 0 – 75 min to 80 ppb formaldehyde at room temperature and 50% RH in air. (b) LSPR response (at  $\lambda_{\text{LSPR}} = 565$  nm) of TiO<sub>2</sub> with nominal 4 wt% Ag to 5 – 500 ppb formaldehyde.

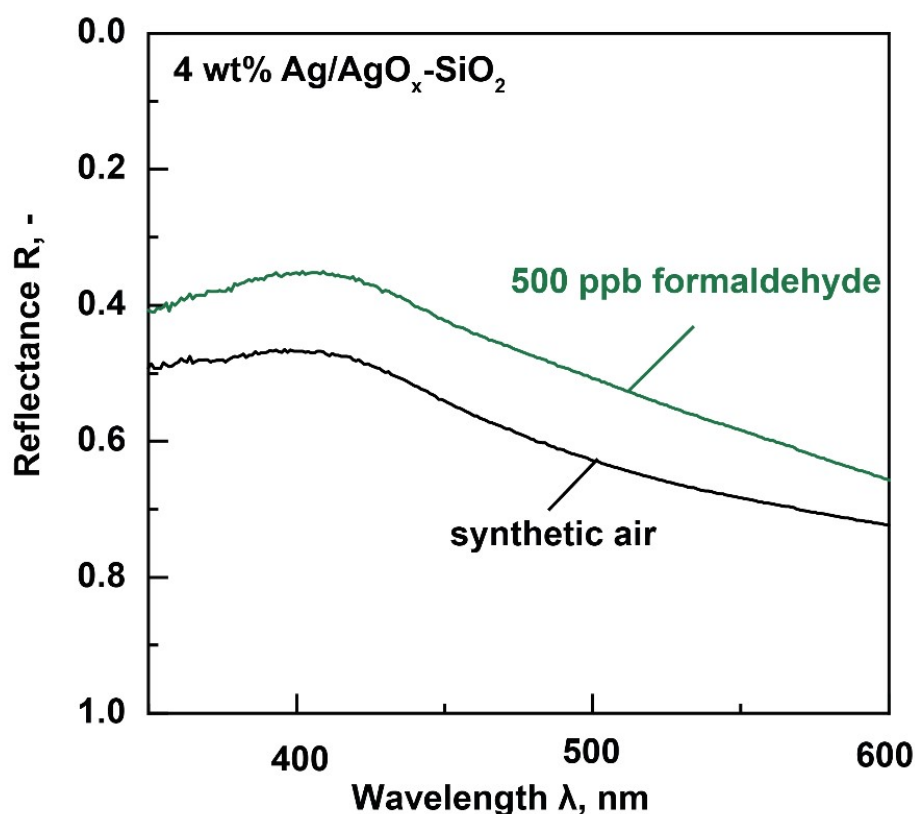

**ESI Fig. 4** Reflectance spectra of Ag/AgO<sub>x</sub> on SiO<sub>2</sub>. UV/Vis reflectance spectra of 4 wt% Ag/AgO<sub>x</sub>-SiO<sub>2</sub> nanohybrids at room temperature in air (black line) and when exposed to 500 ppb formaldehyde for 60 min (green) at 50% RH.

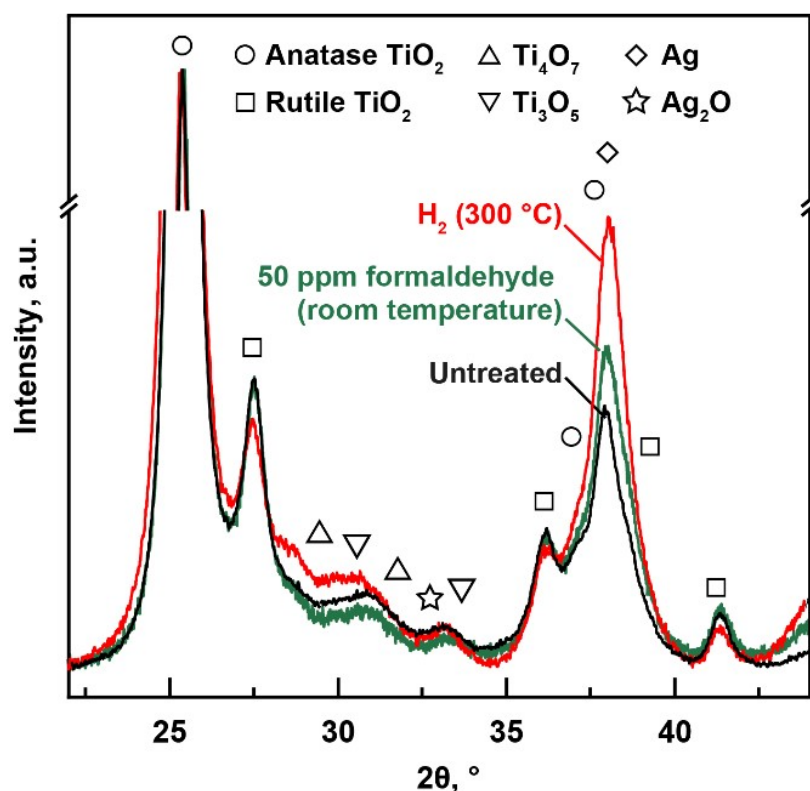

**ESI Fig. 5** XRD patterns.  $\text{TiO}_2$  with nominal 4 wt% Ag before (black), after exposure to 50 ppm formaldehyde at room temperature (green) and after reduction with a  $\text{H}_2/\text{Ar}$  mixture at 300 °C (red). Reference peak positions of anatase  $\text{TiO}_2$  (circles), rutile  $\text{TiO}_2$  (squares),  $\text{Ti}_4\text{O}_7$  (upward triangles),  $\text{Ti}_3\text{O}_5$  (downward triangles), metallic Ag (diamonds) and  $\text{Ag}_2\text{O}$  (star) are indicated. Note the scale break of the ordinate for better visibility.

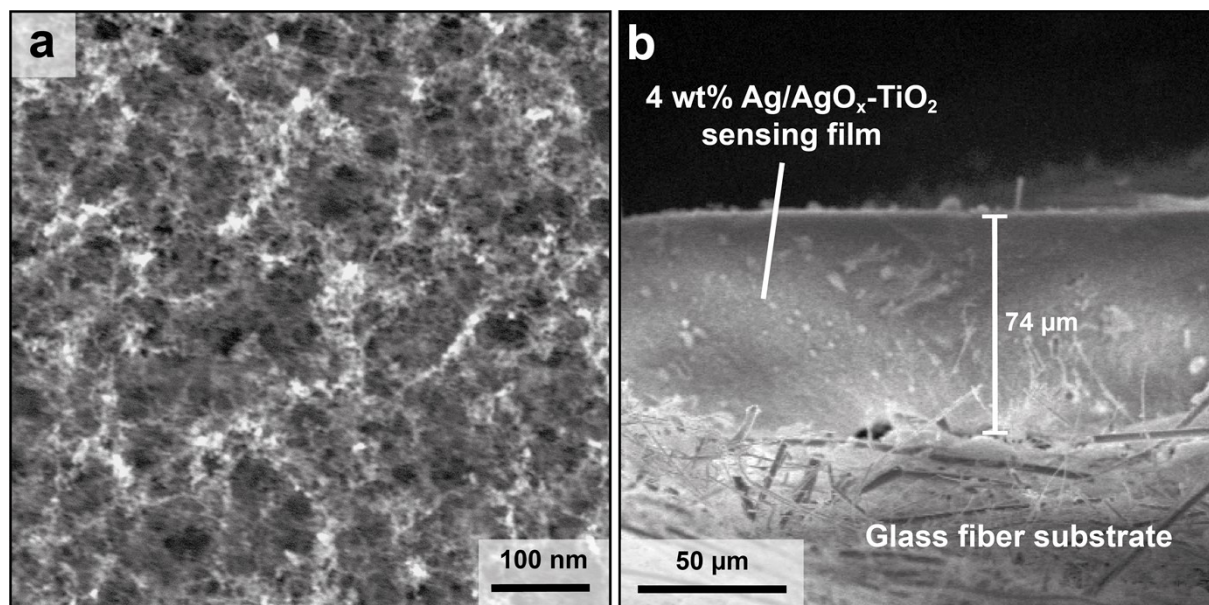

**ESI Fig. 6** Film morphology. Scanning electron microscopy (a) top and (b) cross-sectional view images of a  $\text{TiO}_2$  film with nominal 4 wt% Ag deposited for 16 min onto a glass fiber substrate and annealed at 500 °C for 5 h. The film thickness is  $74 \pm 7 \mu\text{m}$ .

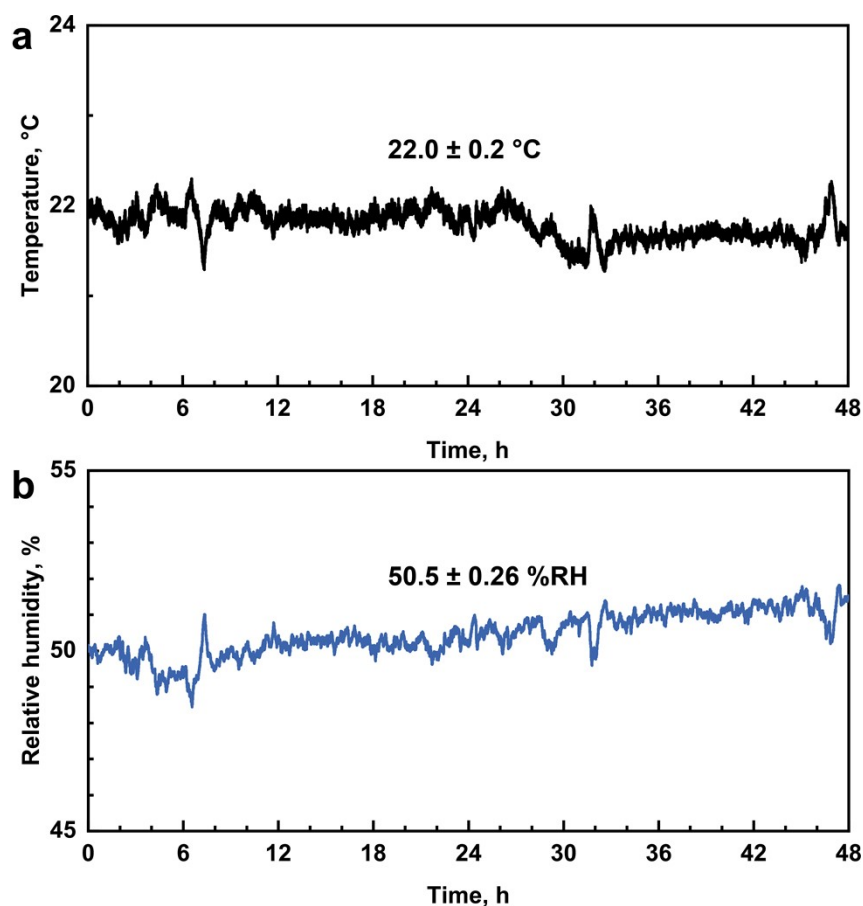

**ESI Fig. 7** Temperature and RH of inlet gas. Temperature (a) and RH (b) upstream of the sensing chamber (blue line) during 48 h of continuous operation.

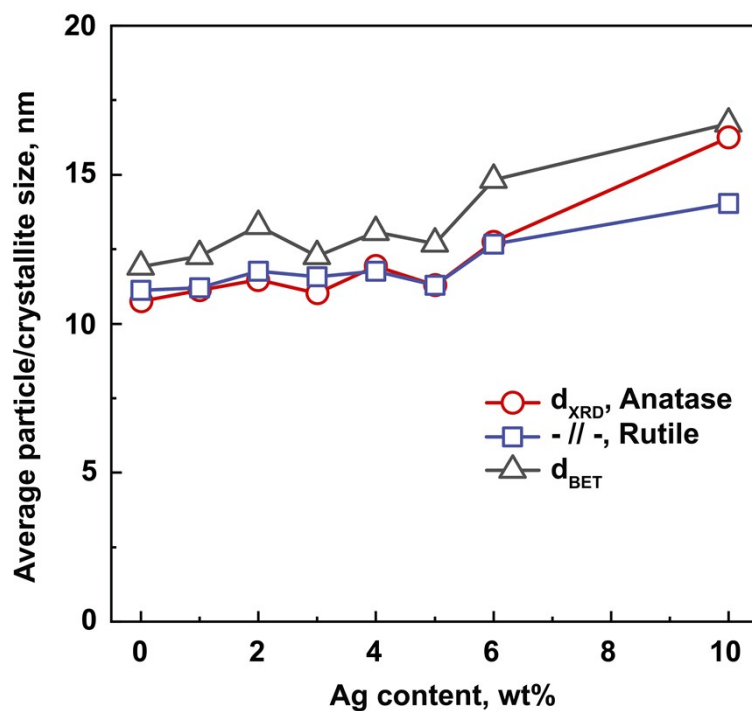

**ESI Fig. 8** Crystal and particle sizes of TiO<sub>2</sub>. XRD-measured crystal sizes of anatase (circles) and rutile (squares) TiO<sub>2</sub> with nominal 0 – 10 wt% Ag after annealing at 500 °C for 5 h. Also shown are the corresponding BET-equivalent particle sizes (triangles).
